# Supplementary material for: Diverse states and stimuli tune olfactory receptor expression levels to modulate food-seeking behavior
Source: eLife. 2022 Aug 31;11:e79557. doi: 10.7554/eLife.79557 (PMC9433090; doi:10.7554/eLife.79557)
Supplement: Supplementary file 1. — Table of genes that are upregulated or downregulated in neurons in fasted animals. Transcripts from neuronal ribotagging biological replicates (three per condition, fed versus fasted) were mapped to the C. elegans genome (WBcel235) with kallisto then analyzed for differential expression of annotated genes with sleuth. Sleuth generated a gene-level model fit to ribotagged vs. input and fed vs. fasted conditions. A Wald test was then applied to generate a beta statistic (b), which approximates to the log2 fold-change in expression between the fed and starved conditions. Genes were included if b > 2 (upregulated in fasted, 802 genes) or b < -2 (downregulated in fasted, 647 genes). [file elife-79557-supp1.xlsx]

## Sheet: upregulated in fasted
target_id	gene_name	b_ipFed_ipFast (note: log-2 scale fold change)
WBGene00020700	T22F3.11	6.24422
WBGene00219308	W06G6.20	6.01417
WBGene00017205	F07C4.12	5.72326
WBGene00001477	fmo-2	5.62435
WBGene00016017	C23G10.11	5.58441
WBGene00018601	F48C1.9	5.14368
WBGene00044092	srbc-71	5.10836
WBGene00010501	K02C4.2	5.10201
WBGene00014818	R07B5.2	5.08916
WBGene00005837	srw-90	4.9963
WBGene00021135	W10G11.2	4.98258
WBGene00009805	F47B8.4	4.98098
WBGene00008597	clec-55	4.93863
WBGene00009486	F36G9.7	4.90603
WBGene00010746	K10D11.2	4.88526
WBGene00044471	F56D6.9	4.84013
WBGene00005106	srd-28	4.79472
WBGene00017488	dct-7	4.75148
WBGene00013957	sre-23	4.69347
WBGene00005219	srg-62	4.65218
WBGene00005721	srv-10	4.64629
WBGene00007203	best-1	4.58929
WBGene00005234	srh-8	4.53961
WBGene00016199	C28H8.8	4.50475
WBGene00010717	K09C8.7	4.49351
WBGene00086565	W06G6.17	4.49334
WBGene00009904	F49E12.12	4.49252
WBGene00195177	Y43F8B.25	4.49047
WBGene00005195	srg-38	4.46812
WBGene00010261	srh-308	4.3945
WBGene00009908	F49H6.5	4.36817
WBGene00015045	cyp-34A10	4.35369
WBGene00007229	C01G6.9	4.34214
WBGene00044292	F56D6.8	4.32889
WBGene00044528	lgc-29	4.30122
WBGene00012819	Y43F8B.9	4.29969
WBGene00019549	K09C4.4	4.29549
WBGene00005838	srw-91	4.29149
WBGene00005273	srh-50	4.26245
WBGene00017509	F16B4.7	4.26072
WBGene00012886	Y45F10D.6	4.23958
WBGene00017677	asp-11	4.23073
WBGene00015597	fbxa-162	4.21825
WBGene00022596	ZC395.4	4.17851
WBGene00023402	ZK488.3	4.16925
WBGene00005575	sri-63	4.15054
WBGene00006075	str-7	4.11226
WBGene00016187	C28G1.2	4.081
WBGene00012312	W06G6.10	4.05752
WBGene00022643	ZK6.8	4.04827
WBGene00007989	fipr-22	4.03793
WBGene00012959	Y47H10A.3	4.03499
WBGene00010413	H25K10.4	4.02368
WBGene00194803	C25F9.16	4.01835
WBGene00018114	srt-41	4.00874
WBGene00011596	T07G12.5	3.99537
WBGene00022892	ZK1290.11	3.99396
WBGene00023281	F39E9.8	3.97944
WBGene00023465	srz-81	3.96612
WBGene00018190	F38H12.5	3.94855
WBGene00044660	fbxa-87	3.93647
WBGene00007990	fipr-23	3.93334
WBGene00019980	chil-14	3.87262
WBGene00002091	ins-8	3.85083
WBGene00021072	W07B8.4	3.84637
WBGene00011727	T12A7.6	3.83631
WBGene00023501	F11E6.11	3.83416
WBGene00005610	srj-22	3.83156
WBGene00020021	R12B2.7	3.82806
WBGene00016716	acs-17	3.82711
WBGene00007992	fipr-24	3.82041
WBGene00005957	srx-66	3.81673
WBGene00003938	pax-2	3.81288
WBGene00020881	T28A11.19	3.80858
WBGene00018789	F54C1.1	3.77221
WBGene00013388	Y62F5A.10	3.76772
WBGene00009226	cyp-37B1	3.76135
WBGene00007358	lact-6	3.75173
WBGene00005719	srv-8	3.74159
WBGene00002103	ins-20	3.72822
WBGene00005780	srw-33	3.70863
WBGene00009778	F46C5.1	3.69142
WBGene00012070	T26H5.8	3.68667
WBGene00077613	F21H7.16	3.67168
WBGene00012069	T26H5.4	3.67059
WBGene00012308	oac-53	3.65775
WBGene00005198	srg-41	3.65579
WBGene00020386	cyp-34A4	3.63794
WBGene00003548	nas-30	3.63491
WBGene00011522	srap-1	3.62058
WBGene00011675	cyp-13A3	3.57963
WBGene00020240	T05B4.9	3.57606
WBGene00000372	cyp-13A7	3.56927
WBGene00020016	lipl-3	3.56789
WBGene00010790	sodh-1	3.55997
WBGene00015332	tyr-1	3.53813
WBGene00013574	lron-13	3.53569
WBGene00020699	T22F3.10	3.52835
WBGene00021516	Y41D4B.14	3.52755
WBGene00015129	sdz-1	3.52745
WBGene00007682	C18D11.6	3.52673
WBGene00010251	sta-2	3.51352
WBGene00003763	nlp-25	3.50957
WBGene00007503	C09H10.9	3.50949
WBGene00015395	nhr-147	3.49225
WBGene00011462	vap-2	3.48642
WBGene00006211	str-166	3.4746
WBGene00016845	C50F7.5	3.45595
WBGene00021197	Y17G9A.4	3.44191
WBGene00020252	T05C1.5	3.43517
WBGene00014093	ZK829.1	3.42925
WBGene00004236	ptr-22	3.4232
WBGene00044803	C02G6.3	3.41343
WBGene00010314	F59B2.12	3.41207
WBGene00005083	srd-5	3.41133
WBGene00007340	C05D12.2	3.40812
WBGene00006213	str-169	3.39676
WBGene00012103	clec-12	3.39071
WBGene00022405	srsx-6	3.38853
WBGene00050899	T10C6.15	3.38262
WBGene00021433	Y39A3A.2	3.36406
WBGene00044472	dct-8	3.35073
WBGene00194664	K09E9.7	3.34834
WBGene00010718	K09C8.8	3.34308
WBGene00017422	F13C5.1	3.33832
WBGene00009808	srm-4	3.33829
WBGene00011706	T11B7.1	3.33596
WBGene00015036	sre-5	3.33534
WBGene00003473	mtl-1	3.33117
WBGene00019020	F57H12.5	3.33082
WBGene00008137	sfxn-1.4	3.316
WBGene00017154	ugt-57	3.31175
WBGene00010862	M04D8.4	3.30422
WBGene00017781	F25E2.3	3.29476
WBGene00009428	F35E12.4	3.29055
WBGene00009487	clec-232	3.29003
WBGene00020356	T08B6.9	3.2882
WBGene00045058	gadr-5	3.28695
WBGene00011851	clec-23	3.28186
WBGene00004211	ptd-2	3.26418
WBGene00005280	srh-57	3.26252
WBGene00005509	srh-305	3.26252
WBGene00021279	Y23H5B.8	3.25736
WBGene00050940	C25D7.16	3.24724
WBGene00013146	Y53C12B.7	3.23983
WBGene00044909	C48D1.7	3.21449
WBGene00022321	fbxa-25	3.21309
WBGene00003634	nhr-44	3.21087
WBGene00077522	T10D4.15	3.20966
WBGene00020627	T20F5.5	3.20785
WBGene00015371	C03A7.13	3.20595
WBGene00008473	E03H4.5	3.20018
WBGene00189950	C39B5.14	3.19821
WBGene00007525	C11G10.1	3.19474
WBGene00012056	nhr-285	3.18801
WBGene00010220	sre-29	3.18792
WBGene00019751	M03D4.4	3.18267
WBGene00001391	far-7	3.1803
WBGene00006123	str-58	3.17993
WBGene00044206	T26H5.9	3.17919
WBGene00017788	F25E5.7	3.1778
WBGene00044569	C25F6.8	3.16861
WBGene00006126	str-63	3.16754
WBGene00018456	fbxc-39	3.16739
WBGene00006208	str-163	3.1631
WBGene00003605	nhr-6	3.16078
WBGene00006623	try-5	3.15375
WBGene00012770	srt-47	3.15274
WBGene00009854	clec-31	3.14484
WBGene00021587	clec-76	3.12949
WBGene00013008	clec-146	3.1265
WBGene00009643	F42G4.6	3.1109
WBGene00009914	F49H6.13	3.11056
WBGene00015044	cyp-34A9	3.10018
WBGene00005906	srx-15	3.0995
WBGene00045401	eol-1	3.09933
WBGene00009724	F45D3.4	3.095
WBGene00006005	srx-114	3.09453
WBGene00010893	cutl-9	3.08793
WBGene00016212	C29F5.3	3.08384
WBGene00001796	gtl-2	3.08123
WBGene00012746	Y40H7A.9	3.08102
WBGene00017303	F09F7.6	3.06937
WBGene00008680	F11A5.15	3.06911
WBGene00005850	srw-103	3.06709
WBGene00189993	C49C3.21	3.06518
WBGene00005868	srw-121	3.05315
WBGene00017838	F26G1.2	3.05277
WBGene00012398	Y6E2A.4	3.05115
WBGene00219434	F54D5.23	3.04796
WBGene00206392	F47D2.11	3.04514
WBGene00022256	Y73B6BL.37	3.04379
WBGene00194717	ZC239.22	3.04348
WBGene00019584	set-12	3.02079
WBGene00005849	srw-102	3.01248
WBGene00014195	srz-10	3.01157
WBGene00023282	F39E9.9	3.00997
WBGene00003561	ncr-1	3.00949
WBGene00005538	sri-26	3.00752
WBGene00018766	F53G2.1	3.0042
WBGene00010110	F55D12.1	3.00228
WBGene00018949	acbp-4	3.00185
WBGene00022404	srsx-5	2.99416
WBGene00022003	Y59E9AR.8	2.99406
WBGene00044348	Y71G12B.31	2.98811
WBGene00012412	Y7A5A.6	2.98602
WBGene00022799	ZK688.4	2.98481
WBGene00021092	fbxb-34	2.98266
WBGene00013524	Y73F8A.15	2.98262
WBGene00002094	ins-11	2.98039
WBGene00016052	dod-3	2.98025
WBGene00006287	str-261	2.97869
WBGene00005756	srw-9	2.97657
WBGene00012648	Y39A1A.9	2.97551
WBGene00010945	chil-13	2.97543
WBGene00022572	ZC239.14	2.97041
WBGene00220257	C02H6.3	2.96749
WBGene00006108	str-43	2.95972
WBGene00008662	F10G8.2	2.95812
WBGene00007714	C25D7.1	2.95776
WBGene00003706	nhr-116	2.95767
WBGene00005638	srm-1	2.95434
WBGene00017376	F11C7.2	2.95179
WBGene00012223	W03C9.8	2.95072
WBGene00044479	F15E6.10	2.94657
WBGene00017713	F22E5.20	2.94459
WBGene00005548	sri-36	2.94047
WBGene00018033	F35B3.7	2.93581
WBGene00005543	sri-31	2.93576
WBGene00020802	btb-2	2.93325
WBGene00009895	scl-2	2.93261
WBGene00019739	M02F4.9	2.93182
WBGene00010187	F57B1.1	2.9231
WBGene00021011	W03G1.5	2.91317
WBGene00019859	R03H10.7	2.91168
WBGene00012515	Y26G10.1	2.90877
WBGene00009221	acs-2	2.90375
WBGene00008644	F10C2.3	2.90373
WBGene00021601	Y46H3A.5	2.90114
WBGene00003775	nmr-2	2.89408
WBGene00014794	K02E2.5	2.89011
WBGene00001804	gur-3	2.88856
WBGene00005295	srh-74	2.88688
WBGene00005816	srw-69	2.88616
WBGene00012822	Y43F8B.12	2.88542
WBGene00008677	F11A5.9	2.88502
WBGene00016696	srbc-19	2.88371
WBGene00004237	ptr-23	2.88278
WBGene00019412	fbxb-49	2.87836
WBGene00008230	pfk-1.2	2.87812
WBGene00017279	F09C12.8	2.87805
WBGene00045283	K08E4.8	2.87761
WBGene00018268	F41C3.2	2.87701
WBGene00005482	srh-277	2.8768
WBGene00016915	C54D2.1	2.86277
WBGene00011801	T16G1.7	2.85966
WBGene00005653	srr-2	2.85902
WBGene00018312	F41H8.1	2.85816
WBGene00044753	F49H12.7	2.853
WBGene00013303	Y57G11C.5	2.85211
WBGene00011798	T16G1.4	2.84639
WBGene00013950	ZK262.3	2.84469
WBGene00005516	sri-4	2.84421
WBGene00015993	C18H7.1	2.84384
WBGene00005197	srg-40	2.8396
WBGene00011448	tag-348	2.83583
WBGene00045193	F53B2.10	2.83095
WBGene00016367	nhr-162	2.8274
WBGene00014698	C37A5.3	2.82616
WBGene00007908	C34B4.3	2.82573
WBGene00012491	Y20C6A.1	2.82474
WBGene00010530	srz-61	2.82417
WBGene00015963	C18B10.6	2.82249
WBGene00001547	gcy-22	2.82221
WBGene00219493	C18D4.12	2.82147
WBGene00005264	srh-41	2.82128
WBGene00022597	ZC395.5	2.81678
WBGene00007121	B0250.4	2.81512
WBGene00019837	R02F2.8	2.81476
WBGene00077764	F59C6.16	2.81178
WBGene00189987	C18H7.12	2.81088
WBGene00022816	fbn-1	2.80506
WBGene00006980	zig-3	2.80418
WBGene00009485	F36G9.3	2.80411
WBGene00022386	Y95B8A.6	2.80231
WBGene00268192	ZK697.17	2.79941
WBGene00013900	ugt-18	2.79478
WBGene00005988	srx-97	2.78447
WBGene00022696	ZK328.7	2.78264
WBGene00013672	catp-1	2.77867
WBGene00194769	Y32B12C.5	2.77605
WBGene00019547	K09C4.1	2.77431
WBGene00018273	F41C3.7	2.774
WBGene00007845	C31E10.4	2.772
WBGene00023039	F41B5.11	2.77116
WBGene00018791	F54C1.6	2.76955
WBGene00010297	F59A1.11	2.76561
WBGene00004234	ptr-20	2.75843
WBGene00045412	C25F9.12	2.75694
WBGene00009968	fig-1	2.75517
WBGene00018111	F36H9.2	2.75181
WBGene00002030	hst-3.1	2.75034
WBGene00018110	F36H9.1	2.74333
WBGene00005514	sri-2	2.74243
WBGene00005735	srv-24	2.74226
WBGene00018621	F48G7.10	2.74221
WBGene00021008	W03F11.5	2.74013
WBGene00000738	col-165	2.73971
WBGene00008807	F14F3.4	2.73696
WBGene00001958	hlh-14	2.73146
WBGene00011643	slc-17.9	2.73024
WBGene00013583	ceh-51	2.7292
WBGene00015860	C16D9.5	2.72171
WBGene00021167	cyp-32B1	2.71784
WBGene00019048	F58E2.4	2.71427
WBGene00019041	fbxc-22	2.71139
WBGene00010062	lipl-1	2.70642
WBGene00003114	mab-23	2.70042
WBGene00011185	R10D12.1	2.70015
WBGene00008100	C44H9.5	2.69798
WBGene00016866	coel-1	2.69592
WBGene00007957	C35C5.8	2.69364
WBGene00015672	C10E2.1	2.69249
WBGene00015712	sre-11	2.69092
WBGene00005105	srd-27	2.68785
WBGene00018466	F45E1.5	2.68547
WBGene00011305	R186.1	2.68215
WBGene00021193	math-44	2.67777
WBGene00016126	nhr-258	2.67205
WBGene00077588	T26H8.5	2.67166
WBGene00045218	K08C9.8	2.6707
WBGene00019659	K11H12.3	2.67002
WBGene00008512	F01G10.10	2.66998
WBGene00019421	K05F6.10	2.66877
WBGene00000979	dhs-16	2.66624
WBGene00018568	F47E1.4	2.66281
WBGene00019699	math-34	2.66039
WBGene00003633	nhr-43	2.65947
WBGene00000759	col-186	2.65503
WBGene00008905	F17B5.1	2.65437
WBGene00008826	fbxa-100	2.65337
WBGene00000069	acy-2	2.65223
WBGene00006258	str-227	2.65179
WBGene00014029	ZK637.12	2.65129
WBGene00008631	F10A3.1	2.64974
WBGene00000928	dao-2	2.64885
WBGene00012318	srxa-1	2.64791
WBGene00008020	C38H2.3	2.64779
WBGene00017810	clec-157	2.64543
WBGene00001211	egl-47	2.64486
WBGene00017370	F10G7.6	2.63816
WBGene00022555	btb-12	2.63611
WBGene00018968	F56D2.8	2.63576
WBGene00005555	sri-43	2.63568
WBGene00005104	srd-26	2.63205
WBGene00010138	anoh-1	2.63132
WBGene00021157	Y4C6B.3	2.62926
WBGene00017839	F26G1.3	2.62776
WBGene00019416	fbxb-44	2.62696
WBGene00017494	irld-31	2.62563
WBGene00019455	K06H7.1	2.6255
WBGene00016806	C50D2.2	2.62436
WBGene00015040	cyp-34A5	2.62313
WBGene00012011	T25B9.5	2.62303
WBGene00014062	ZK673.6	2.62205
WBGene00007366	C06B3.7	2.62031
WBGene00020154	T01G6.10	2.61932
WBGene00020578	T19D12.3	2.61866
WBGene00003710	nhr-120	2.61832
WBGene00013856	ZC168.2	2.61816
WBGene00016016	C23G10.10	2.61805
WBGene00001981	hnd-1	2.61615
WBGene00005678	sru-15	2.61505
WBGene00019648	K11D12.8	2.61271
WBGene00022096	Y69A2AR.25	2.61102
WBGene00011607	T08D2.2	2.60976
WBGene00002013	hsp-12.6	2.60896
WBGene00022139	tub-2	2.60407
WBGene00077573	T08G5.15	2.60196
WBGene00006632	tsp-6	2.60099
WBGene00008126	sre-21	2.6004
WBGene00019342	K02F6.8	2.59956
WBGene00014978	ZC47.8	2.59807
WBGene00011519	T06C12.12	2.59655
WBGene00008017	fbxa-176	2.59206
WBGene00018191	frpr-7	2.58954
WBGene00012591	nspe-1	2.58943
WBGene00020415	T10E9.5	2.58539
WBGene00005245	srh-20	2.58421
WBGene00021256	Y22D7AR.2	2.57951
WBGene00000468	ces-1	2.5789
WBGene00009755	F46A9.2	2.57617
WBGene00015202	B0478.3	2.57594
WBGene00020380	T09B4.6	2.57323
WBGene00020867	shc-2	2.57241
WBGene00007374	C06C3.3	2.56435
WBGene00019982	srbc-58	2.55884
WBGene00007397	C07A4.2	2.55868
WBGene00001564	icl-1	2.55547
WBGene00009202	aptf-4	2.55308
WBGene00010200	F57C7.4	2.55306
WBGene00050920	Y54H5A.5	2.55245
WBGene00005364	srh-148	2.55239
WBGene00014759	F46A8.1	2.55146
WBGene00021544	Y43B11AR.3	2.55146
WBGene00023483	Y75B8A.39	2.55126
WBGene00235308	C37C3.17	2.54904
WBGene00004004	pgp-10	2.54458
WBGene00003715	nhr-125	2.53567
WBGene00007866	C32H11.3	2.53389
WBGene00001096	dsc-1	2.53309
WBGene00005150	sre-2	2.53302
WBGene00003233	mgl-2	2.53296
WBGene00008782	sdz-14	2.5321
WBGene00021858	Y54F10BM.3	2.5315
WBGene00013802	Y116A8C.25	2.52616
WBGene00018526	F47B3.2	2.52512
WBGene00007840	C31C9.6	2.5222
WBGene00020236	lgc-1	2.52203
WBGene00008102	C44H9.7	2.52176
WBGene00007642	C17E4.2	2.5152
WBGene00014145	ZK899.7	2.51468
WBGene00007154	dhc-3	2.51152
WBGene00010137	ztf-26	2.50963
WBGene00010972	R01H10.4	2.50898
WBGene00021121	W09G12.7	2.5029
WBGene00016884	C52E2.5	2.49837
WBGene00011360	lgc-18	2.49229
WBGene00021120	W09G12.6	2.49168
WBGene00018101	math-27	2.49084
WBGene00015368	srt-65	2.48695
WBGene00010046	F54D1.1	2.48691
WBGene00007509	C10C5.5	2.48588
WBGene00021977	Y58A7A.3	2.47715
WBGene00001108	dsl-6	2.47684
WBGene00008834	F14H8.4	2.47098
WBGene00022181	pho-9	2.46847
WBGene00021799	Y53G8AL.1	2.46639
WBGene00010782	K11H3.5	2.46635
WBGene00019782	M60.7	2.46417
WBGene00012604	nspe-2	2.4638
WBGene00020595	T20B5.2	2.46331
WBGene00011523	T06D8.2	2.46229
WBGene00016587	C42C1.9	2.46041
WBGene00022498	hsd-2	2.46008
WBGene00015294	C01C10.2	2.45976
WBGene00012144	T28H10.3	2.45727
WBGene00016579	sre-14	2.4572
WBGene00000724	col-151	2.45654
WBGene00021404	trpl-3	2.45457
WBGene00021408	trpl-4	2.45457
WBGene00015478	mapk-15	2.45311
WBGene00021876	Y54G2A.11	2.45172
WBGene00005383	srh-167	2.45061
WBGene00009773	lipl-2	2.45
WBGene00021978	Y58A7A.4	2.44854
WBGene00016539	madd-2	2.44055
WBGene00023355	W02F12.1	2.44018
WBGene00008462	E02H4.4	2.43961
WBGene00020362	fbxb-10	2.4393
WBGene00016269	C30G4.4	2.43853
WBGene00022383	Y95B8A.2	2.43549
WBGene00010757	pad-2	2.43234
WBGene00021547	Y44E3A.1	2.43126
WBGene00012418	Y7A9C.1	2.42708
WBGene00012709	sre-15	2.42498
WBGene00015409	C03H5.7	2.42477
WBGene00011041	R05H5.7	2.42471
WBGene00044742	Y55F3BR.10	2.42385
WBGene00005040	sra-14	2.42257
WBGene00005513	sri-1	2.42181
WBGene00001591	glc-1	2.42148
WBGene00012131	T28F3.5	2.42122
WBGene00044219	F28F8.10	2.41903
WBGene00012107	T27F6.8	2.4183
WBGene00005754	srw-7	2.4153
WBGene00006807	unc-75	2.41135
WBGene00009728	sdz-19	2.40918
WBGene00017194	F07C3.3	2.40795
WBGene00008987	F20G2.3	2.40793
WBGene00019735	M02F4.1	2.4076
WBGene00008910	F17C8.3	2.40478
WBGene00007502	glb-4	2.40118
WBGene00015476	C05D9.9	2.40016
WBGene00019108	chpf-2	2.40004
WBGene00270318	F26G1.15	2.39783
WBGene00005149	sre-1	2.39618
WBGene00000440	ceh-17	2.3899
WBGene00020646	zmp-6	2.38663
WBGene00015000	AH9.4	2.38505
WBGene00016499	C37C3.7	2.38479
WBGene00008911	F17C8.6	2.38373
WBGene00010585	K05C4.9	2.3827
WBGene00016745	C48B6.9	2.38252
WBGene00006882	vab-19	2.38085
WBGene00194812	F19B2.12	2.37855
WBGene00012045	T26E4.3	2.37837
WBGene00011197	srw-145	2.3781
WBGene00016295	fbxc-40	2.37442
WBGene00018828	sdz-21	2.37207
WBGene00013757	fbxa-113	2.37149
WBGene00195184	F19G12.8	2.3713
WBGene00012085	T27D12.1	2.37113
WBGene00012336	W07G4.2	2.37043
WBGene00012850	Y44A6C.1	2.36925
WBGene00006268	str-240	2.3655
WBGene00269392	F54F7.14	2.36231
WBGene00009061	pals-14	2.36164
WBGene00005210	srg-53	2.36001
WBGene00005716	srv-5	2.35993
WBGene00018618	F48G7.7	2.35922
WBGene00018286	F41E6.5	2.35892
WBGene00044222	T16G12.10	2.3543
WBGene00003176	mec-14	2.35414
WBGene00003716	nhr-126	2.35342
WBGene00007339	C05D12.1	2.3479
WBGene00021130	W10D9.2	2.34369
WBGene00021862	fbxa-48	2.34258
WBGene00020420	T10E10.3	2.33965
WBGene00016670	ilys-3	2.33188
WBGene00022040	Y65B4BR.1	2.32718
WBGene00016090	aexr-2	2.32581
WBGene00016697	cyp-33C2	2.3219
WBGene00011925	T22C8.4	2.32086
WBGene00022133	Y71F9B.15	2.31847
WBGene00015878	C17B7.4	2.31651
WBGene00013486	egas-1	2.31602
WBGene00009751	F46A8.8	2.31127
WBGene00009541	cutl-17	2.31014
WBGene00016403	grsp-3	2.3093
WBGene00005370	srh-154	2.30785
WBGene00013402	Y62H9A.14	2.30583
WBGene00012922	Y47D3A.1	2.30386
WBGene00001821	ham-2	2.30349
WBGene00003778	nnt-1	2.3034
WBGene00007342	C05D12.5	2.30298
WBGene00015675	C10E2.5	2.30249
WBGene00010835	M03B6.3	2.30113
WBGene00020153	nhr-212	2.29991
WBGene00017429	F13D11.4	2.29984
WBGene00005129	srd-51	2.29922
WBGene00012272	dhc-4	2.2987
WBGene00015625	C09B8.8	2.29839
WBGene00005596	srj-8	2.29621
WBGene00020003	R11E3.1	2.2952
WBGene00010931	M162.5	2.2951
WBGene00194952	ZK666.14	2.28763
WBGene00015958	srbc-11	2.28655
WBGene00016147	cyp-32A1	2.28651
WBGene00013585	cyp-42A1	2.28438
WBGene00010601	nhr-268	2.28379
WBGene00019586	K09F6.3	2.28338
WBGene00014229	ZK1128.3	2.27995
WBGene00219378	F43G6.17	2.27904
WBGene00011733	T12D8.5	2.27867
WBGene00012731	Y39G8C.2	2.27794
WBGene00045338	M01B2.13	2.27681
WBGene00010372	H08J19.1	2.27592
WBGene00010688	srz-12	2.27484
WBGene00022179	Y71H2AM.14	2.27228
WBGene00235133	T26H5.14	2.26827
WBGene00016029	elf-1	2.26738
WBGene00010563	K04G2.4	2.26456
WBGene00018787	cutl-20	2.26264
WBGene00018973	srz-20	2.25945
WBGene00255730	F48G7.15	2.25844
WBGene00021237	crtc-1	2.25781
WBGene00021490	Y40B10A.5	2.25685
WBGene00044391	C25H3.15	2.25561
WBGene00022403	Y97E10B.1	2.25396
WBGene00018878	glit-1	2.25279
WBGene00019815	kin-34	2.25107
WBGene00045208	F13E9.15	2.2497
WBGene00022657	ZK105.6	2.24759
WBGene00007745	C26D10.4	2.24752
WBGene00016458	C35E7.6	2.24524
WBGene00005657	srr-6	2.2441
WBGene00194658	R09E10.13	2.24248
WBGene00013845	fbxa-37	2.24031
WBGene00009802	F47B8.1	2.23905
WBGene00010936	ztf-14	2.239
WBGene00045355	D1086.17	2.23789
WBGene00017978	msrp-1	2.23788
WBGene00006127	str-64	2.23456
WBGene00010104	fbxb-60	2.23362
WBGene00019016	F57F4.2	2.23193
WBGene00019909	R06A10.1	2.23066
WBGene00022576	ZC250.2	2.22931
WBGene00018274	F41C3.8	2.22821
WBGene00017796	F25G6.1	2.22741
WBGene00006149	str-90	2.2258
WBGene00017208	fbxb-35	2.22528
WBGene00013890	ZC412.9	2.22526
WBGene00007759	C27A7.9	2.22366
WBGene00018403	F44A2.3	2.22325
WBGene00020204	T04B8.2	2.22313
WBGene00016923	C54F6.5	2.22199
WBGene00005687	sru-24	2.22085
WBGene00019391	irld-11	2.22066
WBGene00044692	fbxb-91	2.22035
WBGene00011548	T06G6.6	2.21837
WBGene00006192	str-145	2.21562
WBGene00045299	fbxc-11	2.21517
WBGene00045300	fbxc-10	2.21517
WBGene00045301	fbxc-9	2.21517
WBGene00021003	W03F9.9	2.21253
WBGene00011235	suro-1	2.21217
WBGene00044093	srbc-72	2.21194
WBGene00012501	Y26D4A.3	2.21192
WBGene00022807	srab-25	2.2072
WBGene00194849	K09A9.8	2.2061
WBGene00007832	srbc-82	2.20528
WBGene00005187	srg-30	2.20471
WBGene00219327	ZK822.9	2.20371
WBGene00023490	F36A2.14	2.20344
WBGene00219549	F59A1.19	2.20103
WBGene00001622	glt-4	2.19855
WBGene00022076	daao-1	2.19777
WBGene00012750	faah-6	2.19613
WBGene00021917	Y55D5A.3	2.19548
WBGene00011514	fbxa-198	2.19436
WBGene00007608	C15C8.6	2.19428
WBGene00012118	grsp-2	2.19336
WBGene00010825	M01G12.14	2.19324
WBGene00000463	ceh-43	2.19286
WBGene00002085	ins-2	2.19282
WBGene00194850	F44F4.15	2.1892
WBGene00005567	sri-55	2.18855
WBGene00016680	C45G9.9	2.18824
WBGene00044215	ZK228.10	2.18741
WBGene00009291	clec-264	2.18625
WBGene00013809	Y116A8C.33	2.18608
WBGene00268206	F54E2.9	2.18539
WBGene00009622	F41E7.6	2.18536
WBGene00019091	srab-13	2.18529
WBGene00020431	irld-50	2.18505
WBGene00044289	Y37F4.8	2.1832
WBGene00005039	sra-13	2.18316
WBGene00003643	nhr-53	2.17995
WBGene00000425	ced-11	2.17505
WBGene00019652	K11G9.1	2.175
WBGene00004947	sos-1	2.17462
WBGene00017315	ugt-36	2.17319
WBGene00017059	msrp-5	2.17306
WBGene00021911	Y55B1BR.1	2.17193
WBGene00004191	prx-1	2.17169
WBGene00006544	tbx-7	2.17118
WBGene00001663	gpa-1	2.17046
WBGene00010422	H32K16.2	2.17034
WBGene00013135	rga-2	2.16976
WBGene00010553	K04C1.3	2.16837
WBGene00018489	F46E10.2	2.1683
WBGene00008796	F14D7.9	2.16733
WBGene00016366	nhr-140	2.16724
WBGene00006229	str-187	2.16449
WBGene00012333	sre-43	2.16404
WBGene00007460	C08F11.13	2.16258
WBGene00009298	srz-58	2.16193
WBGene00008886	F16C3.2	2.16051
WBGene00020073	sdz-28	2.16
WBGene00005240	srh-15	2.1579
WBGene00006505	lagr-1	2.15737
WBGene00006157	str-102	2.15312
WBGene00017811	F26A1.13	2.15287
WBGene00009238	selt-1.2	2.15257
WBGene00011583	T07D10.3	2.15103
WBGene00008412	D2030.2	2.14914
WBGene00011310	T01B4.3	2.14898
WBGene00016979	C56G2.4	2.14795
WBGene00019514	K08B4.2	2.14746
WBGene00016093	srsx-34	2.14317
WBGene00018731	F53A9.8	2.14304
WBGene00018242	F40G9.6	2.14223
WBGene00018176	F38B6.7	2.14207
WBGene00017650	F21A9.1	2.14112
WBGene00008915	F17C11.4	2.14109
WBGene00013166	Y53F4B.20	2.14108
WBGene00045411	C25F9.11	2.14018
WBGene00016281	pals-32	2.13269
WBGene00007446	mboa-4	2.13063
WBGene00012147	VC27A7L.1	2.13032
WBGene00017364	clec-7	2.12838
WBGene00005511	srh-307	2.12786
WBGene00020898	T28D9.9	2.1275
WBGene00206382	F01G12.18	2.12739
WBGene00011097	nhr-206	2.12588
WBGene00006201	str-155	2.12525
WBGene00006881	vab-15	2.12365
WBGene00045474	C49G9.2	2.12344
WBGene00005196	srg-39	2.12307
WBGene00019845	irld-13	2.12182
WBGene00007919	cup-16	2.12111
WBGene00019614	srt-54	2.12095
WBGene00019949	R08C7.5	2.1185
WBGene00044654	fbxa-85	2.11646
WBGene00021369	siah-1	2.11531
WBGene00044807	T19H5.6	2.11478
WBGene00003976	pes-1	2.11234
WBGene00016547	C40A11.4	2.11212
WBGene00020612	arrd-22	2.11195
WBGene00194902	Y39H10B.3	2.11172
WBGene00007414	C07E3.3	2.11123
WBGene00017615	srsx-32	2.10549
WBGene00004991	spp-6	2.10548
WBGene00045207	F13E9.14	2.1048
WBGene00007365	C06B3.6	2.10452
WBGene00006109	str-44	2.10421
WBGene00009853	arrd-27	2.10159
WBGene00005339	srh-120	2.09965
WBGene00045516	F43D2.7	2.09901
WBGene00015753	C14B9.3	2.09819
WBGene00000445	ceh-22	2.09721
WBGene00011611	T08D2.6	2.09463
WBGene00011712	T11F9.10	2.09422
WBGene00009490	fbxa-99	2.09344
WBGene00004210	ptc-3	2.09258
WBGene00016312	C32D5.4	2.08581
WBGene00019090	F59A7.2	2.08312
WBGene00020906	T28H11.8	2.08304
WBGene00175034	F54B3.4	2.08027
WBGene00005654	srr-3	2.07958
WBGene00013517	lgc-52	2.07724
WBGene00015259	dod-20	2.07623
WBGene00019571	K09E2.2	2.07597
WBGene00001623	glt-5	2.07394
WBGene00014197	ZK1053.2	2.0736
WBGene00005958	srx-67	2.07296
WBGene00001103	dsl-1	2.07256
WBGene00017484	F15E6.3	2.0721
WBGene00044012	srxa-19	2.07185
WBGene00044588	ZK1236.9	2.06945
WBGene00016095	C25E10.5	2.06905
WBGene00019591	fbxc-25	2.06831
WBGene00017421	cutl-29	2.06828
WBGene00001670	gpa-8	2.06821
WBGene00009912	srz-94	2.06631
WBGene00015674	C10E2.4	2.06552
WBGene00007452	C08F11.3	2.06518
WBGene00018346	F42C5.4	2.06403
WBGene00018749	F53C3.5	2.06378
WBGene00022540	ZC190.6	2.06332
WBGene00044187	ttll-9	2.06287
WBGene00020758	T24C4.2	2.06254
WBGene00007264	C02F4.4	2.06152
WBGene00005297	srh-76	2.05998
WBGene00005432	srh-222	2.05978
WBGene00020106	R151.1	2.05909
WBGene00020205	arrd-1	2.05891
WBGene00007538	C12D8.9	2.05816
WBGene00011378	T02E1.6	2.05733
WBGene00011321	fil-1	2.05648
WBGene00005953	srx-62	2.05524
WBGene00017535	atf-8	2.05206
WBGene00016933	C54G7.1	2.04788
WBGene00012629	slc-36.3	2.04622
WBGene00017040	D1079.1	2.04591
WBGene00009190	F27D4.6	2.04506
WBGene00009510	F37D6.4	2.04259
WBGene00017361	F10E9.12	2.04209
WBGene00002117	ins-34	2.04105
WBGene00019019	frpr-10	2.03984
WBGene00010510	ent-3	2.03983
WBGene00021095	mlt-8	2.03878
WBGene00002983	lgx-1	2.03689
WBGene00012113	T28B8.1	2.03661
WBGene00003550	nas-32	2.03635
WBGene00012116	del-4	2.03583
WBGene00009530	F38B2.3	2.03286
WBGene00011952	T23F6.5	2.03269
WBGene00001852	hil-1	2.03113
WBGene00000046	acr-7	2.03041
WBGene00009725	F45E6.1	2.02839
WBGene00006628	tsp-2	2.02671
WBGene00022796	ZK688.1	2.0263
WBGene00012763	atln-2	2.02546
WBGene00020445	T12B3.2	2.02543
WBGene00016346	fbxa-120	2.02528
WBGene00005030	sra-4	2.02414
WBGene00002141	inx-19	2.0228
WBGene00015442	C04F1.1	2.02158
WBGene00010740	K10D3.6	2.01938
WBGene00007911	C34B7.1	2.01653
WBGene00008839	sre-37	2.01504
WBGene00001148	eat-20	2.01379
WBGene00003595	ngn-1	2.01321
WBGene00005709	sru-46	2.01201
WBGene00007954	gcp-2.2	2.01157
WBGene00008312	C54G4.2	2.01092
WBGene00009957	F53B2.8	2.01073
WBGene00004748	sdf-9	2.0091
WBGene00012628	Y38H6C.16	2.00778
WBGene00001714	grl-5	2.00739
WBGene00005348	srh-131	2.00717
WBGene00006625	try-7	2.00668
WBGene00044620	bus-4	2.00666
WBGene00044491	Y54G2A.48	2.00516
WBGene00020841	T27A3.5	2.00401
WBGene00003092	lys-3	2.00331
WBGene00020326	math-38	2.00255
WBGene00007943	C34F6.9	2.00203
WBGene00016293	C31H2.3	2.00167
WBGene00219208	B0365.9	2.00049

## Sheet: downregulated in fasted
target_id	gene_name	b_ipFed_ipFast (note: log-2 scale fold change)
WBGene00013007	Y48E1B.8	-5.48823
WBGene00007938	C34F6.1	-5.35818
WBGene00015449	ugt-63	-5.30986
WBGene00017703	F22E5.1	-5.17351
WBGene00022641	ZK6.6	-4.98872
WBGene00013207	zipt-2.3	-4.98557
WBGene00003485	mua-6	-4.92759
WBGene00012176	W01C9.2	-4.82622
WBGene00011671	cyp-13A4	-4.70877
WBGene00014068	nhr-255	-4.64306
WBGene00019262	dmsr-12	-4.52679
WBGene00019473	cyp-35A5	-4.51905
WBGene00021335	spp-23	-4.40397
WBGene00015910	C17F4.2	-4.28802
WBGene00011258	best-15	-4.27617
WBGene00019901	R05G6.9	-4.23454
WBGene00012017	T25C8.1	-4.16152
WBGene00010411	H25K10.1	-4.13188
WBGene00016877	C52D10.3	-4.12914
WBGene00019208	lips-14	-4.06926
WBGene00012859	Y45F3A.1	-4.06422
WBGene00001693	grd-4	-4.04201
WBGene00004997	spp-12	-4.02372
WBGene00013901	ugt-16	-4.00959
WBGene00077684	Y26D4A.21	-3.98211
WBGene00002102	ins-19	-3.97744
WBGene00020592	ugt-12	-3.97457
WBGene00235287	Y55F3C.17	-3.88402
WBGene00000731	col-158	-3.87526
WBGene00018250	F40H3.2	-3.84505
WBGene00019582	K09F5.1	-3.80365
WBGene00000032	abu-9	-3.80166
WBGene00021731	Y49G5A.1	-3.80141
WBGene00017647	F20H11.4	-3.79505
WBGene00008566	acox-1.3	-3.7931
WBGene00008862	F15D4.5	-3.78188
WBGene00006845	unc-122	-3.78124
WBGene00022683	ZK185.3	-3.77795
WBGene00008933	F18A11.6	-3.76538
WBGene00018104	fbxb-53	-3.76009
WBGene00009677	F44A6.5	-3.75457
WBGene00006685	twk-33	-3.74703
WBGene00022747	ZK470.6	-3.71333
WBGene00014142	ZK899.3	-3.69495
WBGene00020270	T05H4.7	-3.6751
WBGene00022229	Y73B6A.2	-3.65665
WBGene00044738	folt-3	-3.64471
WBGene00017446	F14B8.4	-3.63884
WBGene00013947	ZK228.4	-3.63692
WBGene00017668	ins-39	-3.62769
WBGene00015894	acdh-2	-3.62734
WBGene00001702	grd-13	-3.6263
WBGene00008390	D1086.3	-3.6146
WBGene00005593	srj-5	-3.61396
WBGene00010068	F54F7.8	-3.61186
WBGene00020583	T19D12.9	-3.611
WBGene00019414	fbxb-51	-3.59363
WBGene00002260	lbp-8	-3.59268
WBGene00005261	srh-38	-3.58235
WBGene00016797	C50A2.3	-3.57073
WBGene00013169	Y53F4B.23	-3.5703
WBGene00002116	ins-33	-3.56587
WBGene00012678	Y39B6A.16	-3.5555
WBGene00017567	F18E3.11	-3.55425
WBGene00005004	spp-19	-3.54545
WBGene00018375	F43C9.1	-3.54071
WBGene00016595	C42D4.2	-3.53127
WBGene00194928	ZC513.14	-3.53093
WBGene00016712	C46E10.8	-3.5136
WBGene00016340	gba-2	-3.51333
WBGene00044208	Y6G8.6	-3.51038
WBGene00009182	F26H11.4	-3.49608
WBGene00014643	B0391.8	-3.49121
WBGene00003057	lon-3	-3.47631
WBGene00008732	F13B12.4	-3.46355
WBGene00009517	clec-167	-3.45458
WBGene00004230	ptr-16	-3.45358
WBGene00050884	Y69H2.15	-3.44019
WBGene00022155	Y71G12B.17	-3.4327
WBGene00008583	ugt-65	-3.43237
WBGene00009384	piit-1	-3.4248
WBGene00019439	K06B9.2	-3.42186
WBGene00005666	sru-3	-3.42112
WBGene00007165	B0391.10	-3.39722
WBGene00020616	T20D4.10	-3.39173
WBGene00007474	C08H9.15	-3.38529
WBGene00012007	T25B9.1	-3.37884
WBGene00077569	F53F4.18	-3.37653
WBGene00019672	K12B6.8	-3.37455
WBGene00009297	sdz-16	-3.37216
WBGene00000851	cut-1	-3.37056
WBGene00044658	C01G10.17	-3.36358
WBGene00009787	F46F2.3	-3.36185
WBGene00007755	C27A7.3	-3.35955
WBGene00009495	hrg-6	-3.35442
WBGene00006692	twk-42	-3.35136
WBGene00009293	F31D4.8	-3.35082
WBGene00009626	F42A8.1	-3.32876
WBGene00007947	C35A5.3	-3.32355
WBGene00016483	C36C5.14	-3.32235
WBGene00001247	elo-9	-3.31848
WBGene00005343	srh-126	-3.3083
WBGene00007925	C34C12.6	-3.30473
WBGene00017295	F09E10.5	-3.2998
WBGene00000930	dao-4	-3.29886
WBGene00189956	Y34F4.6	-3.29781
WBGene00050917	Y53G8AL.4	-3.29072
WBGene00020528	lgc-54	-3.29054
WBGene00011184	R09H10.7	-3.2833
WBGene00016168	C27F2.6	-3.27993
WBGene00019029	F58B6.1	-3.27903
WBGene00000399	cdh-7	-3.26823
WBGene00018720	F53A3.1	-3.25723
WBGene00206361	K02G10.15	-3.24862
WBGene00008212	C49F5.8	-3.22687
WBGene00020889	T28C12.2	-3.21921
WBGene00000499	chk-2	-3.21901
WBGene00009357	F33C8.2	-3.21264
WBGene00007454	C08F11.7	-3.18749
WBGene00018138	folt-2	-3.17086
WBGene00017962	fbxa-72	-3.17036
WBGene00020353	T08B6.4	-3.16986
WBGene00014576	Y43F11A.6	-3.16112
WBGene00011228	R11.3	-3.15636
WBGene00017501	pud-3	-3.15633
WBGene00021007	W03F11.4	-3.15593
WBGene00044448	ZK783.6	-3.13179
WBGene00012659	Y39A1A.22	-3.13156
WBGene00007209	BE10.1	-3.12731
WBGene00022397	Y97E10AR.2	-3.11958
WBGene00045265	K10C2.8	-3.1102
WBGene00022813	ZK742.3	-3.10671
WBGene00016667	C45E5.4	-3.10388
WBGene00015820	C16A11.7	-3.10214
WBGene00012426	Y11D7A.1	-3.09866
WBGene00011112	R07E5.4	-3.09664
WBGene00044402	Y82E9BL.18	-3.09508
WBGene00021747	Y50D4C.2	-3.09118
WBGene00011694	T10G3.3	-3.08693
WBGene00006085	str-18	-3.07175
WBGene00014813	M176.9	-3.06706
WBGene00009493	hrg-4	-3.06121
WBGene00021213	Y18H1A.9	-3.05543
WBGene00009824	gpdh-1	-3.03928
WBGene00012633	Y38H6C.21	-3.03178
WBGene00001068	dpy-6	-3.02988
WBGene00020394	T10B5.8	-3.02295
WBGene00000430	ceh-5	-3.02252
WBGene00011342	T01G5.7	-3.02072
WBGene00020128	R193.2	-3.0185
WBGene00013935	ZK218.1	-3.01414
WBGene00015359	C02G6.1	-3.01108
WBGene00022707	ZK354.6	-2.99473
WBGene00009301	F31F6.2	-2.99349
WBGene00017594	F19C7.4	-2.99338
WBGene00021585	clec-74	-2.98247
WBGene00022539	ZC190.5	-2.97723
WBGene00005962	srx-71	-2.97516
WBGene00018901	F55G1.5	-2.96615
WBGene00012937	Y47D3A.31	-2.96438
WBGene00008663	eak-6	-2.95654
WBGene00016236	cec-9	-2.95408
WBGene00001633	gly-8	-2.9531
WBGene00015850	C16C8.12	-2.93827
WBGene00006271	str-244	-2.93765
WBGene00012096	T27E9.6	-2.93445
WBGene00007639	C17D12.5	-2.92705
WBGene00013653	Y105C5B.14	-2.91692
WBGene00007873	dod-21	-2.9158
WBGene00007362	cyp-35C1	-2.9138
WBGene00018538	marg-1	-2.90368
WBGene00009360	F33E2.4	-2.90278
WBGene00021196	Y17G9A.3	-2.88916
WBGene00010189	F57B1.6	-2.88856
WBGene00016970	C56E6.2	-2.8862
WBGene00023479	srz-67	-2.88575
WBGene00011351	T01H3.5	-2.88008
WBGene00001495	frm-9	-2.87323
WBGene00017413	F13A2.4	-2.87265
WBGene00011566	nhr-214	-2.87212
WBGene00009178	uggt-2	-2.8696
WBGene00004966	spe-12	-2.86645
WBGene00003573	ncx-8	-2.86474
WBGene00013759	fbxb-59	-2.86376
WBGene00044582	B0222.11	-2.8606
WBGene00021567	Y45G12C.4	-2.85667
WBGene00011655	T09E11.6	-2.85241
WBGene00005352	srh-135	-2.85142
WBGene00003067	lrg-1	-2.85107
WBGene00009418	F35E8.2	-2.8452
WBGene00020560	T19C3.2	-2.84432
WBGene00269419	K05F6.15	-2.84422
WBGene00008560	pho-13	-2.8417
WBGene00017200	F07C4.6	-2.83881
WBGene00001164	efn-3	-2.83463
WBGene00008205	sams-1	-2.82784
WBGene00021241	Y22D7AL.1	-2.82217
WBGene00018920	F56A4.12	-2.81191
WBGene00021226	Y19D10A.11	-2.81191
WBGene00009042	F22B5.4	-2.81141
WBGene00000988	dhs-25	-2.81032
WBGene00016644	abhd-3.2	-2.80779
WBGene00019234	ugt-8	-2.80291
WBGene00021667	snpc-3.2	-2.80134
WBGene00022589	ZC317.6	-2.79375
WBGene00001044	dnj-26	-2.78485
WBGene00043302	F32D8.11	-2.78434
WBGene00017848	F27B3.6	-2.78341
WBGene00086546	cil-1	-2.77974
WBGene00044790	clec-224	-2.7768
WBGene00015885	fbxa-65	-2.7524
WBGene00016152	pho-12	-2.75057
WBGene00013500	Y71A12B.2	-2.74703
WBGene00008028	scl-6	-2.74638
WBGene00011277	R53.8	-2.74222
WBGene00018056	F35F10.6	-2.74046
WBGene00017681	slc-17.5	-2.73419
WBGene00012851	Y44A6C.2	-2.73316
WBGene00017089	poml-2	-2.72771
WBGene00003919	par-4	-2.7193
WBGene00018073	F35H10.10	-2.71274
WBGene00019797	fbxb-31	-2.71113
WBGene00011718	T11G6.3	-2.7057
WBGene00021645	Y47G6A.19	-2.70387
WBGene00010760	K10H10.4	-2.70224
WBGene00009153	F26D2.15	-2.6989
WBGene00010034	F54B11.11	-2.69779
WBGene00007946	ugt-33	-2.69767
WBGene00011002	nhr-205	-2.6912
WBGene00016294	C31H2.4	-2.68557
WBGene00021662	snpc-3.3	-2.6816
WBGene00044633	F54H12.7	-2.67426
WBGene00044719	clec-172	-2.66523
WBGene00206462	B0391.14	-2.66159
WBGene00000646	H17B01.2	-2.65976
WBGene00010031	F54B11.8	-2.65854
WBGene00008559	F07H5.8	-2.6515
WBGene00011104	cut-5	-2.64879
WBGene00077768	K04G2.12	-2.64738
WBGene00001478	fmo-3	-2.64599
WBGene00008401	D2005.6	-2.64032
WBGene00022811	ZK721.4	-2.6394
WBGene00012329	sre-44	-2.63664
WBGene00005002	spp-17	-2.63444
WBGene00015334	sup-18	-2.62599
WBGene00012202	W02B12.4	-2.62594
WBGene00015098	snpc-3.1	-2.62352
WBGene00006141	str-82	-2.61959
WBGene00007859	mrps-31	-2.60546
WBGene00013558	Y75B8A.25	-2.60491
WBGene00005304	srh-83	-2.60346
WBGene00017679	F21F8.5	-2.60335
WBGene00011021	R05A10.4	-2.60093
WBGene00005425	srh-215	-2.59899
WBGene00009691	F44E5.4	-2.59726
WBGene00023503	F17C11.13	-2.58952
WBGene00004228	ptr-14	-2.58687
WBGene00012786	Y43C5B.3	-2.58131
WBGene00000729	col-156	-2.58098
WBGene00010483	K01G12.3	-2.57813
WBGene00013858	ssp-34	-2.57522
WBGene00022705	ZK354.2	-2.57481
WBGene00008426	D2045.9	-2.57406
WBGene00020810	T25G12.2	-2.56863
WBGene00045510	F11A5.17	-2.56719
WBGene00021866	Y54F10BM.12	-2.56401
WBGene00044567	C46C11.4	-2.55677
WBGene00206389	C29F7.10	-2.55098
WBGene00009649	F43C1.5	-2.54939
WBGene00023460	F46H6.5	-2.5472
WBGene00020547	srz-7	-2.54719
WBGene00016590	C42C1.12	-2.54494
WBGene00000047	acr-8	-2.54408
WBGene00021975	Y58A7A.1	-2.54068
WBGene00001399	fat-7	-2.53992
WBGene00015408	C03H5.6	-2.53879
WBGene00020066	dhhc-5	-2.53799
WBGene00000029	abu-6	-2.53106
WBGene00011841	scl-25	-2.52847
WBGene00005279	srh-56	-2.5269
WBGene00017868	slc-28.2	-2.52607
WBGene00007335	C05C12.1	-2.5252
WBGene00010373	H08M01.1	-2.52347
WBGene00022736	ZK418.7	-2.52277
WBGene00009648	zhit-2	-2.5227
WBGene00008629	cpt-5	-2.52243
WBGene00011513	fbxa-197	-2.52114
WBGene00020924	W02B3.4	-2.51871
WBGene00011353	T01H8.2	-2.51605
WBGene00194925	K08D8.11	-2.51507
WBGene00006621	try-3	-2.50898
WBGene00044530	F32D1.11	-2.50766
WBGene00012592	Y38E10A.14	-2.50709
WBGene00044562	C14E2.7	-2.50689
WBGene00005346	srh-129	-2.50638
WBGene00007913	cyp-36A1	-2.5026
WBGene00006526	tax-4	-2.50031
WBGene00006202	str-156	-2.49889
WBGene00044318	tag-267	-2.49781
WBGene00009125	F25H5.2	-2.49505
WBGene00017873	F28A10.5	-2.49386
WBGene00015545	C06G1.1	-2.49329
WBGene00018404	nhr-39	-2.49186
WBGene00044684	T08G11.2	-2.49065
WBGene00019731	M02D8.5	-2.48979
WBGene00013272	aqp-12	-2.48617
WBGene00019197	H14A12.5	-2.48604
WBGene00000055	acr-16	-2.48371
WBGene00019987	R09F10.3	-2.48135
WBGene00008963	F19H8.2	-2.48085
WBGene00195069	W03G9.10	-2.47993
WBGene00011826	T18D3.9	-2.47958
WBGene00007851	clec-245	-2.47715
WBGene00023271		-2.47477
WBGene00013027	Y49A3A.4	-2.47244
WBGene00008959	F19H6.4	-2.46941
WBGene00004183	prk-2	-2.46685
WBGene00017614	F20A1.2	-2.46548
WBGene00001783	gst-35	-2.46442
WBGene00017730	F22H10.6	-2.46253
WBGene00015952	C18B2.1	-2.46045
WBGene00005380	srh-164	-2.45794
WBGene00018578	F47G3.3	-2.45715
WBGene00001424	fis-1	-2.45666
WBGene00013319	ccch-5	-2.45054
WBGene00044381	K10G6.5	-2.45023
WBGene00012680	Y39B6A.21	-2.44952
WBGene00021795	Y52E8A.2	-2.44882
WBGene00018589	F48B9.3	-2.44733
WBGene00001984	hog-1	-2.44337
WBGene00002026	hsp-70	-2.44024
WBGene00195147	F14E5.8	-2.43914
WBGene00219274	T25G12.13	-2.4389
WBGene00045484	F34D10.9	-2.43058
WBGene00009260	calm-1	-2.42997
WBGene00005175	srg-18	-2.4279
WBGene00004932	sod-3	-2.42559
WBGene00008630	nhr-175	-2.42279
WBGene00014122	ZK863.1	-2.42068
WBGene00019437	K06A9.3	-2.4197
WBGene00017798	slc-17.8	-2.41757
WBGene00008904	F17A2.13	-2.41557
WBGene00194816	ZK616.61	-2.41517
WBGene00021055	W06A11.4	-2.41369
WBGene00013478	Y69E1A.8	-2.41188
WBGene00008621	F09C8.1	-2.40896
WBGene00001839	hdl-1	-2.40807
WBGene00007448	C08F8.6	-2.40788
WBGene00018429	F44E7.7	-2.40633
WBGene00012368	fbxa-93	-2.40286
WBGene00006948	wrt-2	-2.40013
WBGene00017507	F16B4.5	-2.3962
WBGene00017866	stn-2	-2.39517
WBGene00020048	lgc-12	-2.39437
WBGene00005408	srh-195	-2.39401
WBGene00010832	M02G9.3	-2.39362
WBGene00219271	F36H5.14	-2.39219
WBGene00014947	Y71A12B.14	-2.39067
WBGene00009431	dct-17	-2.38974
WBGene00206412	T24H7.8	-2.38767
WBGene00014039	ZK662.2	-2.38742
WBGene00044745	Y62E10A.20	-2.38446
WBGene00014063	clec-143	-2.38403
WBGene00015426	C04E6.12	-2.38092
WBGene00255605	T23B3.8	-2.37859
WBGene00008570	kcnl-2	-2.36965
WBGene00017442	F13H8.9	-2.36496
WBGene00014194	ZK1037.6	-2.36414
WBGene00022809	ZK697.14	-2.36228
WBGene00018282	F41D9.2	-2.35914
WBGene00017142	EEED8.14	-2.35731
WBGene00019218	madf-3	-2.357
WBGene00020554	T19A5.3	-2.35582
WBGene00008387	D1081.9	-2.34983
WBGene00195212	F09B12.7	-2.34726
WBGene00000636	col-60	-2.3471
WBGene00015373	C03B1.2	-2.34625
WBGene00018877	aman-1	-2.34524
WBGene00015765	C14C11.1	-2.34308
WBGene00012032	T26C5.2	-2.34036
WBGene00015519	doxa-1	-2.33897
WBGene00022211	Y73B3A.9	-2.33805
WBGene00018135	F37A4.5	-2.33665
WBGene00022804	ZK697.1	-2.33552
WBGene00015165	B0361.11	-2.33134
WBGene00000755	col-182	-2.32851
WBGene00013674	Y105E8A.14	-2.32789
WBGene00007678	srz-90	-2.32783
WBGene00017553	nep-8	-2.3276
WBGene00000753	col-180	-2.32721
WBGene00008633	fbxa-18	-2.32598
WBGene00008069	C43D7.7	-2.32233
WBGene00044109	K02E11.10	-2.32182
WBGene00008708	F11E6.4	-2.31884
WBGene00011954	T23F11.2	-2.31793
WBGene00015623	C09B8.4	-2.31756
WBGene00004062	pmp-5	-2.31629
WBGene00005131	srd-53	-2.31411
WBGene00003644	nhr-54	-2.31276
WBGene00009371	F33H2.8	-2.31039
WBGene00023427	F14D2.15	-2.30636
WBGene00015739	ugt-7	-2.30566
WBGene00044439	Y51H7C.15	-2.30009
WBGene00016713	C46E10.9	-2.29994
WBGene00001070	dpy-8	-2.29943
WBGene00021603	clec-204	-2.29513
WBGene00011075	R07A4.4	-2.29412
WBGene00021423	tftc-1	-2.29253
WBGene00045403	K10H10.12	-2.29247
WBGene00022770	acp-1	-2.29236
WBGene00008124	C47A4.3	-2.29028
WBGene00007295	C04C11.1	-2.28759
WBGene00010273	srm-3	-2.28757
WBGene00020087	R119.1	-2.2873
WBGene00017658	F21C10.9	-2.28645
WBGene00015082	B0244.7	-2.28469
WBGene00010634	K07F5.6	-2.28258
WBGene00013328	Y57G11C.39	-2.28139
WBGene00012640	Y38H8A.7	-2.28106
WBGene00005017	sqt-2	-2.27901
WBGene00019749	M03A8.3	-2.27693
WBGene00015238	B0511.13	-2.27619
WBGene00021386	Y37F4.5	-2.27592
WBGene00005949	srx-58	-2.27522
WBGene00002976	lev-9	-2.27352
WBGene00004048	plx-2	-2.27325
WBGene00003884	osm-3	-2.27279
WBGene00002127	inx-5	-2.27229
WBGene00013179	clec-100	-2.26921
WBGene00016282	C31B8.7	-2.26801
WBGene00022261	clec-210	-2.26775
WBGene00008215	C49F8.3	-2.26517
WBGene00001758	gst-10	-2.26331
WBGene00008822	F14H3.3	-2.26227
WBGene00045305	ZC250.4	-2.26119
WBGene00002199	kin-15	-2.26086
WBGene00004815	skr-9	-2.25725
WBGene00019924	fbxc-33	-2.25342
WBGene00007741	glb-8	-2.2521
WBGene00000042	acr-2	-2.25092
WBGene00009838	fbxa-187	-2.25075
WBGene00021387	Y37F4.6	-2.25037
WBGene00001373	exp-1	-2.24739
WBGene00001468	flr-4	-2.24532
WBGene00009027	F21G4.6	-2.24308
WBGene00011959	nyn-1	-2.24179
WBGene00019322	ahcy-1	-2.23966
WBGene00017945	F31D5.2	-2.23853
WBGene00044788	ttr-38	-2.23802
WBGene00044156	Y66C5A.1	-2.23716
WBGene00008743	F13D12.9	-2.23456
WBGene00019045	fbxb-47	-2.2314
WBGene00017473	F14H12.6	-2.23113
WBGene00007996	C38C6.3	-2.231
WBGene00020878	T28A11.16	-2.23095
WBGene00001646	gna-1	-2.23069
WBGene00016352	tbck-1	-2.2304
WBGene00020832	T26C12.2	-2.22936
WBGene00009292	F31D4.5	-2.22906
WBGene00018667	bath-7	-2.2272
WBGene00008883	F16B12.7	-2.2257
WBGene00003839	ocr-2	-2.22565
WBGene00000606	col-17	-2.22517
WBGene00044315	F41G3.20	-2.2244
WBGene00000958	dgk-1	-2.22411
WBGene00003642	nhr-52	-2.22258
WBGene00018541	nhr-186	-2.22053
WBGene00007687	C18E9.7	-2.21715
WBGene00013074	hmit-1.2	-2.21605
WBGene00013717	madf-10	-2.21275
WBGene00012686	Y39B6A.27	-2.21043
WBGene00015688	C10G11.8	-2.20726
WBGene00206381	F52H2.15	-2.20479
WBGene00015634	C09D4.3	-2.20279
WBGene00010331	F59D12.3	-2.20097
WBGene00012744	Y40H7A.4	-2.20065
WBGene00005667	sru-4	-2.19864
WBGene00019934	R07C12.4	-2.19799
WBGene00017072	D2096.5	-2.19637
WBGene00013246	Y57A10A.1	-2.19483
WBGene00021666	Y48G1BL.7	-2.19222
WBGene00235332	K04A8.20	-2.1919
WBGene00020084	R105.1	-2.19161
WBGene00044261	Y87G2A.20	-2.19035
WBGene00020645	T21D9.2	-2.18912
WBGene00013646	Y105C5B.3	-2.18873
WBGene00005142	srd-65	-2.18756
WBGene00006667	twk-12	-2.18522
WBGene00017330	sre-10	-2.17949
WBGene00018484	F46C8.1	-2.17929
WBGene00015989	C18H2.2	-2.17623
WBGene00021123	W09G12.9	-2.1722
WBGene00194663	F38B2.6	-2.17183
WBGene00271567	T28F4.8	-2.17161
WBGene00004913	snn-1	-2.1699
WBGene00185001	F56A8.9	-2.16942
WBGene00013145	cutl-2	-2.16738
WBGene00006006	srx-115	-2.16721
WBGene00008755	sdz-13	-2.16702
WBGene00022327	fbxa-15	-2.16544
WBGene00007542	C12D8.15	-2.16351
WBGene00018203	F39F10.3	-2.16274
WBGene00000048	acr-9	-2.16057
WBGene00018393	msra-1	-2.15838
WBGene00020715	nspd-4	-2.15487
WBGene00017387	mpst-4	-2.15359
WBGene00018266	nhr-183	-2.15138
WBGene00010851	M04C3.2	-2.1496
WBGene00001763	gst-15	-2.14797
WBGene00010385	H12D21.9	-2.14676
WBGene00044035	F27E5.7	-2.14662
WBGene00013758	fbxa-114	-2.14594
WBGene00009041	cut-3	-2.14038
WBGene00005167	srg-9	-2.14018
WBGene00004145	pqn-62	-2.13966
WBGene00018433	ceh-82	-2.13904
WBGene00020009	R11F4.3	-2.13746
WBGene00009726	tbc-13	-2.13572
WBGene00008897	F16H6.7	-2.13558
WBGene00005165	srg-7	-2.1343
WBGene00271577	B0244.16	-2.13283
WBGene00013965	ZK287.4	-2.13217
WBGene00044488	Y54G2A.45	-2.12987
WBGene00016559	C41A3.2	-2.12914
WBGene00015998	srt-59	-2.12897
WBGene00008216	mec-19	-2.12885
WBGene00019459	K06H7.8	-2.12807
WBGene00044041	F57G9.6	-2.12784
WBGene00189954	F40G9.18	-2.12512
WBGene00044676	fbxa-42	-2.12429
WBGene00195086	F21C10.13	-2.12209
WBGene00017114	E03H12.7	-2.12171
WBGene00007885	ugt-21	-2.12127
WBGene00017386	nspd-5	-2.12073
WBGene00021298	Y27F2A.6	-2.12001
WBGene00001202	egl-36	-2.11958
WBGene00018643	drd-50	-2.11866
WBGene00012815	phy-4	-2.11514
WBGene00001737	grl-28	-2.11478
WBGene00020708	dmd-8	-2.1145
WBGene00007693	C23H4.4	-2.11425
WBGene00004156	pqn-74	-2.11231
WBGene00016211	sdz-3	-2.112
WBGene00008968	elli-1	-2.1101
WBGene00013051	Y50E8A.8	-2.10852
WBGene00021061	W06E11.1	-2.10744
WBGene00206384	D1005.10	-2.10704
WBGene00235267	Y77E11A.23	-2.10508
WBGene00006922	vhl-1	-2.10371
WBGene00007601	C15C6.2	-2.1006
WBGene00045488	F57B1.9	-2.09972
WBGene00004764	sel-7	-2.09925
WBGene00013416	Y64G10A.7	-2.09483
WBGene00022706	ZK354.3	-2.09458
WBGene00016133	C26B9.3	-2.09426
WBGene00023502	clec-184	-2.09299
WBGene00020012	R11G1.6	-2.09281
WBGene00004257	pxn-2	-2.09243
WBGene00010650	K08C9.1	-2.09132
WBGene00008511	F01G10.9	-2.09131
WBGene00001397	fat-5	-2.09062
WBGene00020451	fbxa-11	-2.08943
WBGene00022485	fbxa-63	-2.08825
WBGene00008993	F21A3.3	-2.08684
WBGene00017456	F14D2.8	-2.08338
WBGene00017998	F33D4.6	-2.08327
WBGene00008086	C44C10.5	-2.08124
WBGene00001388	far-4	-2.08075
WBGene00011546	T06G6.4	-2.07935
WBGene00012041	T26E3.8	-2.07871
WBGene00008605	mlt-9	-2.07747
WBGene00008280	acc-2	-2.0764
WBGene00007831	srbc-83	-2.07532
WBGene00010856	M04C9.1	-2.06976
WBGene00011236	R11A8.1	-2.06775
WBGene00009862	fbxb-67	-2.06753
WBGene00020215	T04G9.4	-2.06636
WBGene00015646	mlt-10	-2.06569
WBGene00005690	sru-27	-2.06513
WBGene00044301	lgc-28	-2.06421
WBGene00021124	W10C4.1	-2.06214
WBGene00020761	T24C4.5	-2.06192
WBGene00015818	C16A11.5	-2.06094
WBGene00000723	col-150	-2.0603
WBGene00001811	haf-1	-2.05978
WBGene00018548	clec-79	-2.05961
WBGene00015465	C05C8.8	-2.05785
WBGene00017754	F23F12.8	-2.05572
WBGene00044493	Y54G2A.50	-2.0554
WBGene00009109	degt-1	-2.05423
WBGene00021918	Y55D5A.4	-2.05357
WBGene00008977	iglr-1	-2.05331
WBGene00005290	srh-69	-2.05151
WBGene00006610	tre-4	-2.0502
WBGene00003816	asns-1	-2.04941
WBGene00014208	ZK1067.2	-2.04486
WBGene00011817	T16H12.9	-2.04377
WBGene00002991	lin-2	-2.04342
WBGene00010274	F58G6.3	-2.04244
WBGene00021249	Y22D7AL.11	-2.04028
WBGene00010989	R03D7.2	-2.04008
WBGene00006658	twk-3	-2.03849
WBGene00010975	R01H10.7	-2.03684
WBGene00020295	pqbp-1.2	-2.03649
WBGene00044225	C38D4.10	-2.03628
WBGene00008991	F20G4.2	-2.03474
WBGene00018717	F52H2.5	-2.03271
WBGene00010781	K11H3.4	-2.0319
WBGene00021282	set-21	-2.03012
WBGene00005253	srh-30	-2.02896
WBGene00021084	W08E12.3	-2.02863
WBGene00020591	nhr-220	-2.02852
WBGene00001767	gst-19	-2.02818
WBGene00001627	gly-2	-2.02787
WBGene00004221	ptr-6	-2.02691
WBGene00206388	K10C2.14	-2.02615
WBGene00015849	C16C8.11	-2.02461
WBGene00010516	K02E11.7	-2.02434
WBGene00016980	C56G2.5	-2.02411
WBGene00019150	H04J21.1	-2.02272
WBGene00011062	R06C7.2	-2.02258
WBGene00195056	C45E1.5	-2.02162
WBGene00010212	fbxa-192	-2.01952
WBGene00009015	F21D9.1	-2.01924
WBGene00003979	pes-5	-2.01906
WBGene00016149	frpr-3	-2.01718
WBGene00044241	C53D6.11	-2.01514
WBGene00219292	ZK1320.14	-2.01482
WBGene00010647	K08C7.4	-2.01428
WBGene00015582	C07H6.9	-2.01384
WBGene00022608	madf-9	-2.01291
WBGene00018465	F45E1.4	-2.01286
WBGene00004120	pqn-32	-2.01195
WBGene00017930	F29G9.1	-2.0118
WBGene00012545	Y37D8A.3	-2.01088
WBGene00013421	fbxa-220	-2.0107
WBGene00004146	pqn-63	-2.01061
WBGene00007079	AC8.7	-2.01058
WBGene00043990	AC8.12	-2.01058
WBGene00021040	W05G11.2	-2.00943
WBGene00185089	C16A11.10	-2.00782
WBGene00010657	K08D8.3	-2.00699
WBGene00009586	F40F9.10	-2.0066
WBGene00019080	F59A3.7	-2.00572
WBGene00013840	fbxa-151	-2.0046
WBGene00007233	C01G10.6	-2.00216
WBGene00013872	ZC374.2	-2.00198
